# Supplementary material
Source: publisher figshare collection journal article supplement (https://karger.figshare.com/ndownloader/files/24109277)
Supplement: Supplementary file 1 [file 24109277]

|  | Mepolizumab group | | | | |
| --- | --- | --- | --- | --- | --- |
| T0 (n=20) | T1 (n=20) | T6 (n=14) | P Values (T0-T1) | P Values (T0-T6) |
| Functional parameters:   - FEV1(%) - FEV1(ml) - TIFFENAU index | 84.4±26.6  2558.86±886  69.4±12.4 | 87.1±21.5  2820±960.7  72.8±10.26 | 90.3±24.4  2861±961  74.9±11 | 0.04  0.0037  0.04 | 0.037  0.0026  0.032 |
| Peripheral eosinophilia  (cell/mm3 / %) | 915±617 / 11.4±6.5 | 140±83.5 / 1.6±1.2 | 74±61/1±0.8 | <0.0001 | <0.0001 |
| sL-selectin (ng/ml) | 1442±1003 | 630±413 | NA | 0.0012 | NA |
| KL-6 (U/ml) | 332.7±124 | 310.7±107.1 | 334±136 | ns | ns |
| Lymphocytes immunophenotyping:  CD45  CD3  CD4  CD8  CD19  NK  NKT-like | 19.1±5.4  81.8±8.5  47.9±12  31.7±14  7.8±5.2  9.9±5.8  12.21±8.7 | 17.9±7.4  79.5±7.7  53.5±8.4  24±8  8.3±5.7  13±16  8.4±8.3 | 18.9±13  77±11  51±13  21±6  9±8.7  12±8  7±4.5 | ns  ns  ns  0.03  ns  ns  0.02 | ns  ns  ns  0.021  ns  ns  0.024 |

Tab 1s functional parameters, peripheral eosinophilia, sL-Selectin, KL-6 and lymphocytes immunphenotyping at t0 t1 and t6 for mepolizumab group.
